# Supplementary material for: Safe handovers for every patient: an interrupted time series analysis to test the effect of a structured discharge bundle in Dutch hospitals
Source: PubMed Central journal article supplement (PMC6561436; doi:10.1136/bmjopen-2018-023446), 2019-06-04
Supplement: bmjopen-2018-023446supp001.pdf [file bmjopen-2018-023446supp001.pdf]

**Supplement Table 1. Adherence to the Intervention Protocol**

|                                                                 | Hospital 1                                                                                          | Hospital 2                                                                                                                              | Hospital 3                                                                                            | Hospital 4                                                                                             | Hospital 5                                                                                               | Hospital 6              | Hospital 7           | Hospital 8                                                                                                                                |
|-----------------------------------------------------------------|-----------------------------------------------------------------------------------------------------|-----------------------------------------------------------------------------------------------------------------------------------------|-------------------------------------------------------------------------------------------------------|--------------------------------------------------------------------------------------------------------|----------------------------------------------------------------------------------------------------------|-------------------------|----------------------|-------------------------------------------------------------------------------------------------------------------------------------------|
| Pre-intervention                                                | Sep '15 - Feb '16                                                                                   | Oct '15 - March '16                                                                                                                     | Jan '16 - June '16                                                                                    | Dec '15 - May '16                                                                                      | March '16 – Aug '16                                                                                      | April '16 – Sep '16     | May '16 – Oct '16    | April '16 – Sep '16                                                                                                                       |
| Implementation                                                  | March '16 - April '16                                                                               | April '16 - May '16                                                                                                                     | July '16 - Aug '16                                                                                    | June '16 - July '16                                                                                    | Sep '16 - Oct '16                                                                                        | Oct '16 - Nov '16       | Nov '16 - Dec '16    | Oct '16 - Nov '16                                                                                                                         |
| Post-intervention                                               | May '16 – Oct '16                                                                                   | June '16 - Nov '16                                                                                                                      | Sep '16 – Feb '17                                                                                     | Aug '16 - Jan '16                                                                                      | Nov '16 – April '17                                                                                      | Dec '16 – May '17       | Jan '17 – June '17   | Dec '16 – May '17                                                                                                                         |
| <b>Leadership and education of project leaders</b>              |                                                                                                     |                                                                                                                                         |                                                                                                       |                                                                                                        |                                                                                                          |                         |                      |                                                                                                                                           |
| Who were present at the kick off meeting February, 2016?        | Hospital president; local project leader; 2 team leaders (nurses); 2 physicians; nurse; pharmacists | Local project leader; geriatrician; head of the liaison department; physician                                                           | 2 local project leaders; head of the liaison department                                               | Chief of staff; local project leader; team leader surgery ward (nurse); head of the liaison department | Local project leader; head of the liaison department; manager patient logistics; 2 team leaders (nurses) | 2 local project leaders | Local project leader | Local project leader; senior researcher transitional care; medical specialist,                                                            |
| Who were present at the first feedback session?                 | Project leader; head of the liaison department                                                      | Project leader; pharmacist; communication assistant                                                                                     | 2 local project leaders; liaison nurse                                                                | Project leader; liaison nurse; nurse geriatrics                                                        | Local project leader                                                                                     | 2 local project leaders | -                    | 2 project leaders                                                                                                                         |
| Who were present at the second feedback session?                | Project leader                                                                                      | Project leader                                                                                                                          | 2 project leaders                                                                                     | -                                                                                                      | Project leader                                                                                           | -                       | Project leader       | 2 project leaders                                                                                                                         |
| <i>Implementation points</i>                                    | 10                                                                                                  | 8                                                                                                                                       | 8                                                                                                     | 7                                                                                                      | 7                                                                                                        | 4                       | 2                    | 7                                                                                                                                         |
| <b>Project group</b>                                            |                                                                                                     |                                                                                                                                         |                                                                                                       |                                                                                                        |                                                                                                          |                         |                      |                                                                                                                                           |
| Was there a local TIP project group, and who participated?      | Yes, project leader; 2 senior nurses of participating wards, management assistant                   | Yes, project leader; geriatrician; head liaison department, physician; pharmacist; communication assistant; manager Security & Services | Yes, 2 project leaders; 2 residents; 2 medical specialists; nurse; liaison nurse; pharmacist; manager | Yes, chief of staff; project leader; 2 team leaders (nurses); head liaison department; orthopedist     | Yes, project leader; head liaison department; 2 medical specialists, geriatrician                        | No                      | No                   | Yes, local project leader; 3 medical specialists; 2 residents, manager quality and safety; manager process optimization; medical director |
| How often did the local project group meet? 1 point per meeting | Monthly for 2 months, during pilot period every week (2 months).                                    | Every five weeks during pre-intervention and pilot period                                                                               | 2 times, before pilot period.                                                                         | Every two weeks during pre-intervention period                                                         | Every six weeks, during pre-intervention and pilot period                                                | -                       | -                    | Monthly during pre-intervention, pilot period and first two months of post-                                                               |

|                                                                                                     |                                                             |                                                        |     |     |                                      |                                                                    |                                                        |                                                  |
|-----------------------------------------------------------------------------------------------------|-------------------------------------------------------------|--------------------------------------------------------|-----|-----|--------------------------------------|--------------------------------------------------------------------|--------------------------------------------------------|--------------------------------------------------|
|                                                                                                     |                                                             |                                                        |     |     |                                      |                                                                    |                                                        | intervention period                              |
| <i>Implementation points</i>                                                                        | 10                                                          | 12                                                     | 10  | 18  | 10                                   | 0                                                                  | 0                                                      | 17                                               |
| <b>Implementation of TIP elements</b>                                                               |                                                             |                                                        |     |     |                                      |                                                                    |                                                        |                                                  |
| Was it policy to set a discharge date within 48h after admission?                                   | Yes                                                         | Yes                                                    | Yes | Yes | Yes                                  | Yes                                                                | Yes                                                    | Yes                                              |
| Was the planned discharge date communicated to patients?                                            | Yes                                                         | Yes                                                    | Yes | Yes | Yes                                  | No                                                                 | Yes                                                    | Yes                                              |
| Was it policy to start with arrangement of required post-discharge care within 48h after admission? | No, liaison nurse has to wait for final discharge date      | No, liaison nurse has to wait for final discharge date | Yes | Yes | No, liaison department is overloaded | Yes                                                                | No, liaison nurse has to wait for final discharge date | Yes                                              |
| Was it policy to set up patient handovers within 48h after admission?                               | No                                                          | No                                                     | No  | No  | No                                   | No                                                                 | No                                                     | No                                               |
| Did physicians hold discharge conversations, using a checklist during the pilot period?             | No                                                          | No                                                     | No  | No  | No                                   | No                                                                 | No                                                     | No                                               |
| Does the nurse holds a discharge conversation, using a checklist?                                   | Yes                                                         | No                                                     | Yes | Yes | Yes                                  | No                                                                 | Yes                                                    | Yes                                              |
| Was the patient discharge letter implemented?                                                       | Yes, but only for some diagnosis at internal medicine ward. | No                                                     | No  | No  | No                                   | Yes , but only at internal medicine ward for frail older patients. | No                                                     | No, a discharge summary was implemented instead. |
| <i>Implementation points</i>                                                                        | 3.5                                                         | 2                                                      | 4   | 4   | 3                                    | 2.5                                                                | 3                                                      | 4.5                                              |
| <b>Education of physicians and nurses</b>                                                           |                                                             |                                                        |     |     |                                      |                                                                    |                                                        |                                                  |

|                                                                                                             |                                                                                                                           |                                                                                  |                                                                                             |                                                                                                                                                  |                                                      |                                                  |                                                              |                                                                                                                                                                                         |      |      |      |      |      |       |     |      |      |
|-------------------------------------------------------------------------------------------------------------|---------------------------------------------------------------------------------------------------------------------------|----------------------------------------------------------------------------------|---------------------------------------------------------------------------------------------|--------------------------------------------------------------------------------------------------------------------------------------------------|------------------------------------------------------|--------------------------------------------------|--------------------------------------------------------------|-----------------------------------------------------------------------------------------------------------------------------------------------------------------------------------------|------|------|------|------|------|-------|-----|------|------|
| How were physicians and nurses informed about the TIP and how often?                                        | Kick-off meeting at participating wards; during morning report; working instructions were sent by email to all physicians | Kick-off meeting; meeting at participating wards; E-learning; 1 feedback meeting | During morning reports; project leader informed every physician separately; intranet; email | During morning reports; intranet; email; posters & pocket cards; and project leaders went to participating wards to inform physicians and nurses | Email and project leader went to participating wards | Kick-off meeting, during several morning reports | Physicians were not educated with regard to the intervention | During several morning report; email; project leaders went to participating wards to inform physicians and nurses; medical specialists from project group informed physicians in person |      |      |      |      |      |       |     |      |      |
| Did physicians and/or nurses receive feedback with regard to their discharge letters and if yes, how often? | No                                                                                                                        | No                                                                               | No                                                                                          | No                                                                                                                                               | No                                                   | Only for nurses                                  | No                                                           | Yes, daily on internal medicine and monthly on surgery ward, via email.                                                                                                                 |      |      |      |      |      |       |     |      |      |
| <i>Implementation points</i>                                                                                | 3                                                                                                                         | 4                                                                                | 4                                                                                           | 5                                                                                                                                                | 2                                                    | 2.5                                              | 0                                                            | 5                                                                                                                                                                                       |      |      |      |      |      |       |     |      |      |
| <b>Total implementation points</b>                                                                          | <b>26.5</b>                                                                                                               | <b>26</b>                                                                        | <b>26</b>                                                                                   | <b>34</b>                                                                                                                                        | <b>22</b>                                            | <b>9</b>                                         | <b>5</b>                                                     | <b>33.5</b>                                                                                                                                                                             |      |      |      |      |      |       |     |      |      |
| <b>Pre-intervention vs. post-intervention period scores</b>                                                 |                                                                                                                           |                                                                                  |                                                                                             |                                                                                                                                                  |                                                      |                                                  |                                                              |                                                                                                                                                                                         |      |      |      |      |      |       |     |      |      |
| <b>Pre-intervention period</b>                                                                              |                                                                                                                           |                                                                                  |                                                                                             |                                                                                                                                                  |                                                      |                                                  |                                                              |                                                                                                                                                                                         |      |      |      |      |      |       |     |      |      |
| median                                                                                                      | % letters within 24h                                                                                                      | 8.15                                                                             | 9.0                                                                                         | 0.90                                                                                                                                             | 47.3                                                 | 6.71                                             | 23.5                                                         | 10.48                                                                                                                                                                                   | 13.1 | 0.79 | 50.0 | 6.79 | 9.2  | 14.21 | 7.6 | 5.83 | 20.9 |
| <b>Post-intervention</b>                                                                                    |                                                                                                                           |                                                                                  |                                                                                             |                                                                                                                                                  |                                                      |                                                  |                                                              |                                                                                                                                                                                         |      |      |      |      |      |       |     |      |      |
| median                                                                                                      | % letters within 24h                                                                                                      | 9.08                                                                             | 19.5                                                                                        | 1.0                                                                                                                                              | 48.5                                                 | 5.48                                             | 24.2                                                         | 5.79                                                                                                                                                                                    | 19.7 | 0.29 | 49.6 | 7.98 | 16.7 | 22.44 | 1.5 | 0.83 | 53.8 |
